# Supplementary material for: Psychometric Properties of the Gastrointestinal Symptom Severity Scale in a Sample of Adolescents and Young Adults
Source: MDPI journal article supplement (doi:10.3390/jcm13061662), 2024-03-14
Supplement: s1 [file s1]

**Supplementary Table S1.***Presence of gastrointestinal disorders in the total sample.*

| <b>Gastrointestinal disorders</b> | <b><i>n</i> (%)</b> |
|-----------------------------------|---------------------|
| Infectious diarrhea               | 287 (23.0)          |
| Nonspecific abdominal pain        | 246 (19.7)          |
| Dyspepsia                         | 132 (10.6)          |
| Gastroesophageal reflux           | 138 (11.1)          |
| Significant Flatulence            | 67 (5.4)            |
| Irritable Bowel Syndrome          | 46 (3.7)            |
| Dyschezia                         | 18 (1.4)            |
| Inflammatory Bowel Disease        | 13 (1.0)            |
| Celiac Disease                    | 11 (0.9)            |
| Ulcerative Colitis                | 9 (.7)              |
| Peptic Ulcer Disease              | 5 (.4)              |
| Crohn's disease                   | 4 (.3)              |

**Supplementary Table S2.***Percentiles of the GSSS.*

|                                                      | Percentile | Severity level of<br>gastrointestinal<br>symptoms | Factor 1       | Factor 2   | Total SSGS       |
|------------------------------------------------------|------------|---------------------------------------------------|----------------|------------|------------------|
| <b>Total Sample</b>                                  | 29         | Very Low                                          | 0              | 0          | 1                |
|                                                      | 49         | Low                                               | 1              | 0          | 2                |
|                                                      | 69         | Medium-low                                        | 2              | 1          | 3                |
|                                                      | 79         | Medium-High                                       | 3              | 1          | 4                |
|                                                      | 89         | High                                              | 4              | 2          | 5                |
|                                                      | 99         | Very High                                         | 7              | 6          | 12               |
| <b>M (SD) Total Sample</b>                           |            |                                                   | 1.63 (1.74)    | .73 (1.21) | 2.37 (2.54)      |
| <b>Females</b>                                       | 29         | Very Low                                          | 0              | 0          | 1                |
|                                                      | 49         | Low                                               | 1              | 0          | 2                |
|                                                      | 69         | Medium-Low                                        | 2              | 1          | 3                |
|                                                      | 79         | Medium-High                                       | 3              | 1          | 4                |
|                                                      | 89         | High                                              | 4              | 2          | 6                |
|                                                      | 99         | Very High                                         | 8              | 6          | 12               |
| <b>M (SD) Females</b>                                |            |                                                   | 1.79 (1.82)    | .76 (1.24) | 2.55 (2.64)      |
| <b>Males</b>                                         | 29         | Very Low                                          | 0              | 0          | 0                |
|                                                      | 49         | Low                                               | 1              | 0          | 1                |
|                                                      | 69         | Medium-Low                                        | 2              | 1          | 3                |
|                                                      | 79         | Medium-High                                       | 2              | 1          | 3                |
|                                                      | 89         | High                                              | 3              | 2          | 4                |
|                                                      | 99         | Very High                                         | 6              | 6          | 10               |
| <b>M (SD) Males</b>                                  |            |                                                   | 1.18 (1.38)    | .66 (1.09) | 1.84 (2.13)      |
| <b>Contrast Statistics between sex (Effect Size)</b> |            |                                                   | <b>P value</b> |            | <b>Hedges' g</b> |
| Total SSGS Females vs. Total SSGS Males              |            |                                                   | $p < .05$      |            | .28              |
| Factor 1 SSGS Females vs. Factor 1 SSGS Males        |            |                                                   | $p < .05$      |            | .35              |
| Factor 2 SSGS Females vs. Factor 2 SSGS Males        |            |                                                   | $p > .05$      |            | .08              |

*Notes.* M=Mean; SD= Standard Deviation.
